# Supplementary material for: MiR-132 controls pancreatic beta cell proliferation and survival through Pten/Akt/Foxo3 signaling
Source: PubMed Central journal article supplement — Mol Metab. 2019 Nov 22;31:150–62. doi: 10.1016/j.molmet.2019.11.012 (PMC6928290; doi:10.1016/j.molmet.2019.11.012), 2019-11-22
Supplement: mmc1.pdf [file mmc1.pdf]

**ESM Table 1**

| <b>Primary Antibody (antigen)</b>               | <b>Company</b>   | <b>Cat.#</b> | <b>Host</b> | <b>Dilution</b> |
|-------------------------------------------------|------------------|--------------|-------------|-----------------|
| Cleaved Caspase-3 (Asp175)                      | Cell Signal      | 9661         | Rabbit      | 1:500           |
| Caspase-9 (C9)                                  | Cell Signal      | 9508         | Rabbit      | 1:500           |
| Akt (pan) (11E7)                                | Cell Signal      | 4685         | Rabbit      | 1:1000          |
| Phospho-AKT (Ser437)                            | Cell Signal      | 9271         | Rabbit      | 1:1000          |
| CREB (48H2)                                     | Cell Signal      | 9197         | Rabbit      | 1:1000          |
| Phospho-CREB (Ser133)<br>(87G3)                 | Cell Signal      | 9198         | Rabbit      | 1:1000          |
| ERK 1/2                                         | Promega          | V1141        | Rabbit      | 1:1000          |
| Phospho-p44/42 MAPK<br>(Erk1/2) (Thr202/Tyr204) | Cell Signal      | 9101         | Rabbit      | 1:1000          |
| Anti-FOXO3                                      | Sigma<br>Aldrich | SAB3500508   | Rabbit      | 1:1000          |
| Anti-FOXO3A (phospho S253)                      | Cell Signal      | 9466         | Rabbit      | 1:750           |
| PTEN (138G6)                                    | Cell Signal      | 9559         | Rabbit      | 1:1000          |
| Phospho-PTEN<br>(Ser380/Thr382/383)             | Cell Signal      | 9554         | Rabbit      | 1:1000          |
| RasGAP                                          | R&D<br>Systems   | AF5094       | Goat        | 1:1000          |
| $\gamma$ -Tubulin                               | Sigma<br>Aldrich | T6557        | Mouse       | 1:5000          |

| <b>Secondary Antibody<br/>(antigen)</b>           | <b>Company</b>   | <b>Cat.#</b> | <b>Host</b> | <b>Dilution</b> |
|---------------------------------------------------|------------------|--------------|-------------|-----------------|
| Rabbit IgG (H + L)-HRP<br>Conjugate               | BIO-RAD          | 170-6515     | Goat        | 1:4000          |
| Mouse IgG (H + L)-HRP<br>Conjugate                | BIO-RAD          | 170-6516     | Goat        | 1:4000          |
| Goat IgG (whole molecule)-<br>Peroxidase antibody | Sigma<br>Aldrich | A-5420       | Rabbit      | 1:4000          |

**ESM Table 1.** Information on primary and secondary antibodies used for immunoblotting (related to Figures 2 and 5).
