# Supplementary material for: MiR-132 controls pancreatic beta cell proliferation and survival through Pten/Akt/Foxo3 signaling
Source: PubMed Central journal article supplement — Mol Metab. 2019 Nov 22;31:150–62. doi: 10.1016/j.molmet.2019.11.012 (PMC6928290; doi:10.1016/j.molmet.2019.11.012), 2019-11-22
Supplement: mmc8.pdf [file mmc8.pdf]

**ESM Table 8**

|                                              | Insulin+ cells | BrdU+ cells | Proliferation rate | Number of counted islets | Number of Insulin+ cells per islet |
|----------------------------------------------|----------------|-------------|--------------------|--------------------------|------------------------------------|
| wildtype sham operation                      | 7127           | 116         | 1,82%              | 300                      | 23,8                               |
| mir132 <sup>-/-</sup> sham operation         | 8066           | 82          | 0,98%              | 300                      | 26,8                               |
| wildtype partial pancreatectomy              | 8572           | 1277        | 15,48%             | 269                      | 31,9                               |
| mir132 <sup>-/-</sup> partial pancreatectomy | 9524           | 453         | 4,99%              | 300                      | 31,7                               |

**ESM Table 8:** Total numbers of counted insulin+ and BrdU+ cells (related to Figure 6c-g).
