# Supplementary material for: MiR-132 controls pancreatic beta cell proliferation and survival through Pten/Akt/Foxo3 signaling
Source: PubMed Central journal article supplement — Mol Metab. 2019 Nov 22;31:150–62. doi: 10.1016/j.molmet.2019.11.012 (PMC6928290; doi:10.1016/j.molmet.2019.11.012), 2019-11-22
Supplement: mmc10.pdf [file mmc10.pdf]

# ESM Figure 1

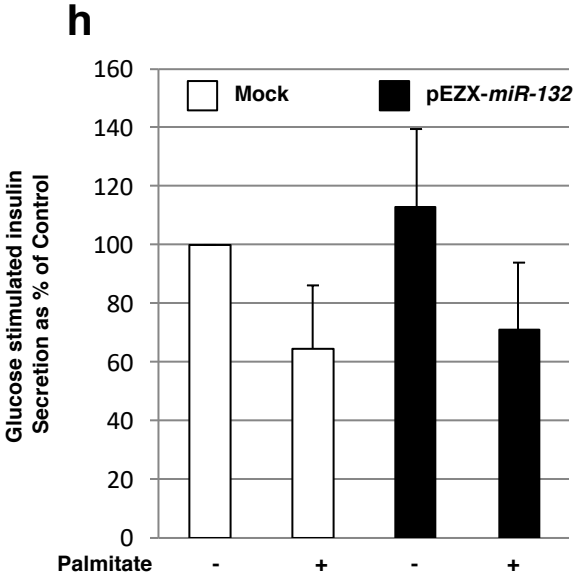

**Figure 1:** Effect of miR-132 overexpression on glucose stimulated insulin secretion in presence or absence of 0.5 mM palmitate as described in Material and Methods. White bars: MIN6 cells transfected with mock; black bars: MIN6 cells overexpressing *miR-132*, n=4.
