# Supplementary material for: MiR-132 controls pancreatic beta cell proliferation and survival through Pten/Akt/Foxo3 signaling
Source: PubMed Central journal article supplement — Mol Metab. 2019 Nov 22;31:150–62. doi: 10.1016/j.molmet.2019.11.012 (PMC6928290; doi:10.1016/j.molmet.2019.11.012), 2019-11-22
Supplement: mmc11.pdf [file mmc11.pdf]

## ESM Figure 2

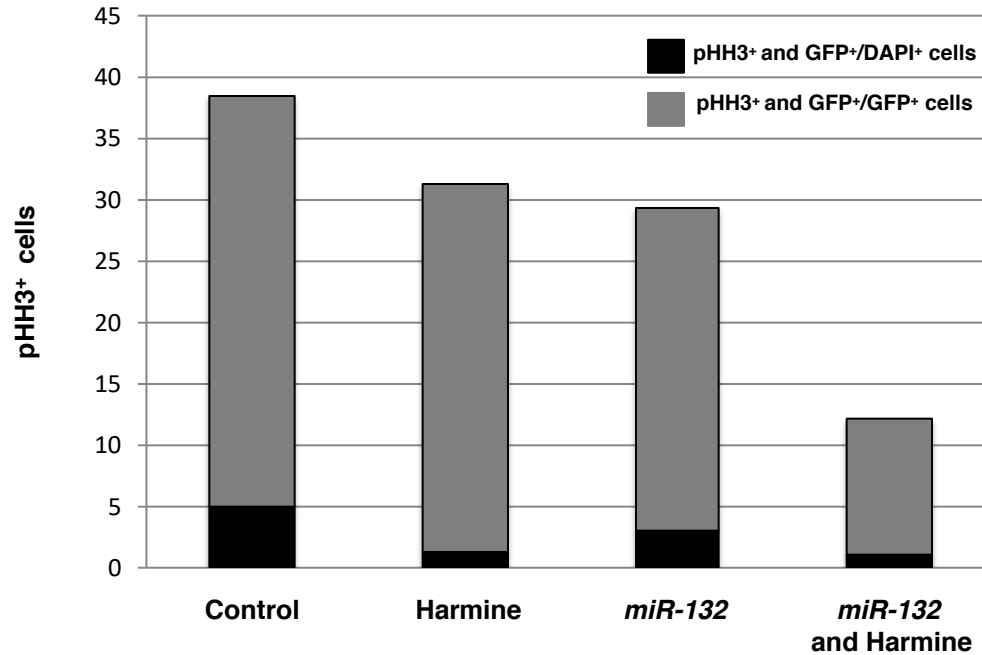

**Figure 2.** Immunostaining of EndoC $\beta$ H1 cells with anti-phospho-histone H3<sup>(Ser 10)</sup> in the above indicated conditions and as described in figure 3 (a-d).
