# Supplementary material for: MiR-132 controls pancreatic beta cell proliferation and survival through Pten/Akt/Foxo3 signaling
Source: PubMed Central journal article supplement — Mol Metab. 2019 Nov 22;31:150–62. doi: 10.1016/j.molmet.2019.11.012 (PMC6928290; doi:10.1016/j.molmet.2019.11.012), 2019-11-22
Supplement: mmc12.pdf [file mmc12.pdf]

# ESM Figure 3

**a**

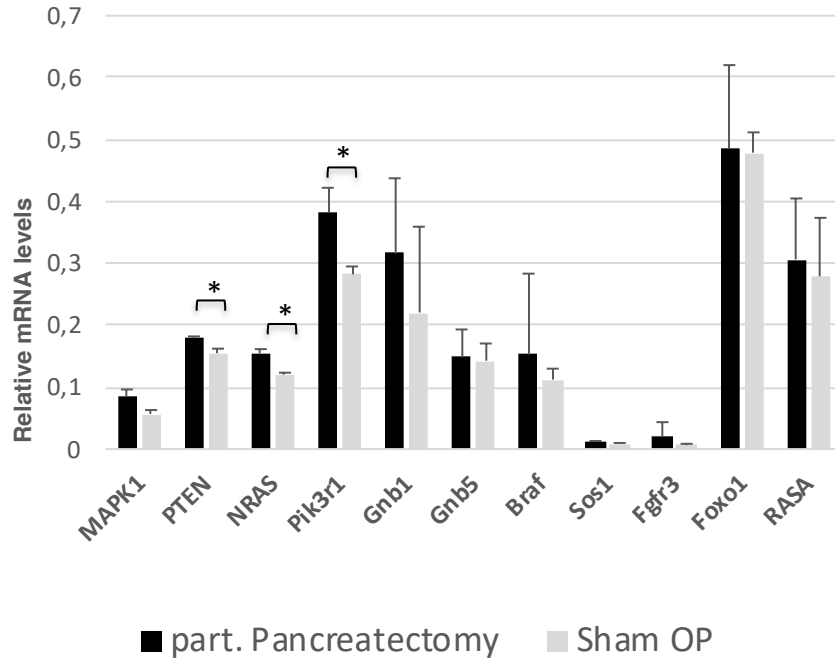

**b**

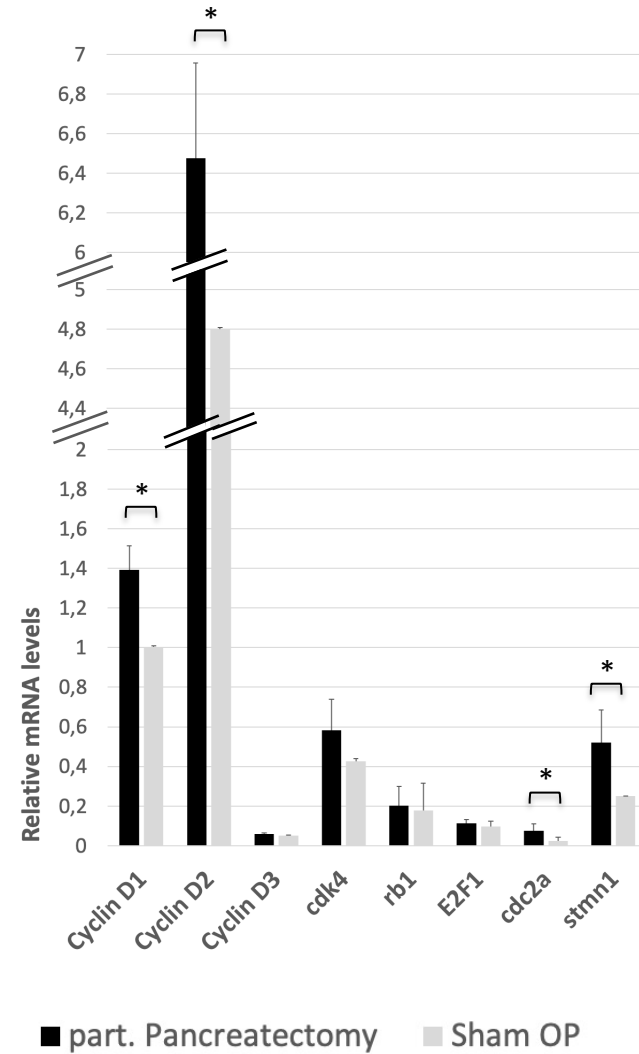

**Figure 3:** Gene expression signal following affymetrix hybridization of RNA extracted from islets isolated by LCM from sham operated (grey bars) or pancreatectomized (black bars) mice: **(a)** on genes that were differentially expressed in Min6 cells overexpressing *miR-132* and **(b)** on selected genes known for their role on cell proliferation and cell cycle.
