# Supplementary material for: MiR-132 controls pancreatic beta cell proliferation and survival through Pten/Akt/Foxo3 signaling
Source: PubMed Central journal article supplement — Mol Metab. 2019 Nov 22;31:150–62. doi: 10.1016/j.molmet.2019.11.012 (PMC6928290; doi:10.1016/j.molmet.2019.11.012), 2019-11-22
Supplement: mmc15.pdf [file mmc15.pdf]

# ESM Figure 6

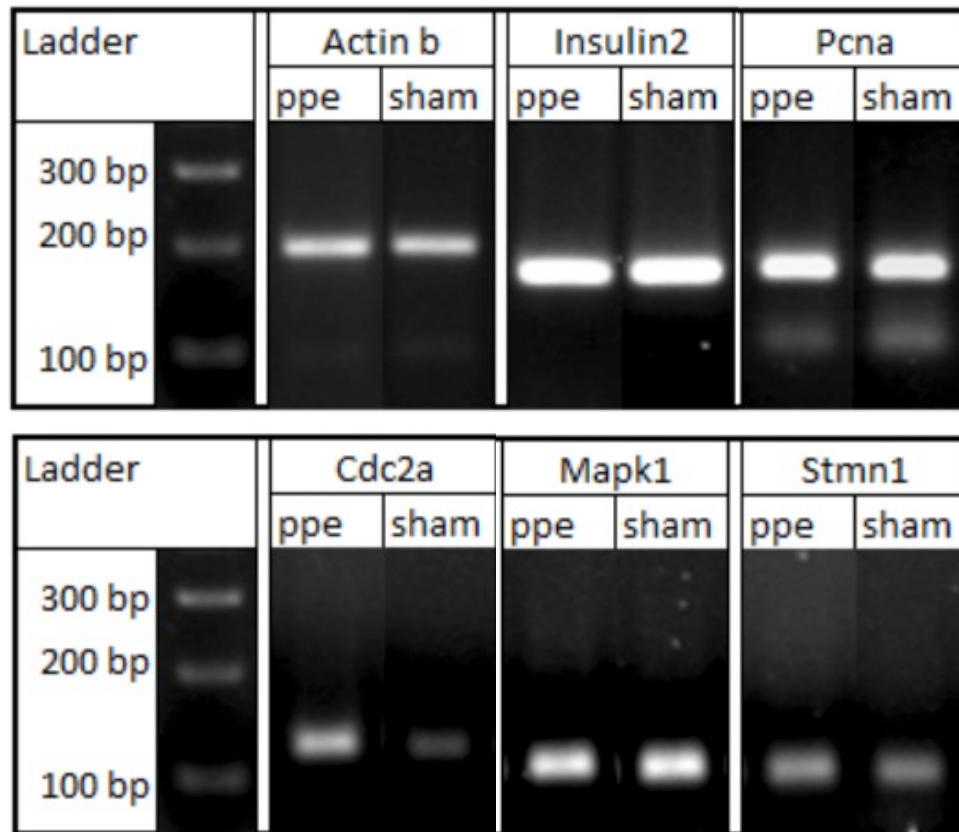

| Gene        | beta actin |       | Ins2  |       | Cdc2a |       | Stmn1 |       | Pcna  |       | Mapk1 |       |
|-------------|------------|-------|-------|-------|-------|-------|-------|-------|-------|-------|-------|-------|
| Group       | PPE        | Sham  | PPE   | Sham  | PPE   | Sham  | PPE   | Sham  | PPE   | Sham  | PPE   | Sham  |
| MW Ct       | 31,38      | 30,62 | 17,33 | 16,69 | 28,08 | 29,47 | 26,22 | 27,49 | 26,36 | 26,27 | 26,25 | 25,60 |
| Fold change | 1,69       |       | 1,08  |       | 4,44  |       | 4,09  |       | 1,6   |       | 1,08  |       |
| p-value     | 0,597      |       | 0,899 |       | 0,031 |       | 0,039 |       | 0,43  |       | 0,87  |       |

**Figure 6:** Quantitative PCR (Q-PCR) on selected genes beta cell specific such as *insulin2* gene or known to regulate cell proliferation and cell cycle such as *Cdc2a*, *Stmn1*, *Pcna* and *Mapk1*. Q-PCR of *Beta actin* was included for normalization.
